# Supplementary material for: Pyrolyzed carbon with embedded NiO/Ni nanospheres for applications in microelectrodes
Source: Royal Society of Chemistry journal article supplement (doi:10.1039/c6ra06864b), 2016-01-01
Supplement: c6ra06864b1.pdf [file c6ra06864b1.pdf]

## Supporting Information

# Pyrolyzed carbon with embedded NiO/Ni nanospheres for applications in microelectrodes

Cong Yin,<sup>a</sup> Liang He,<sup>a\*</sup> Yunfei Wang,<sup>a</sup> Zehua Liu,<sup>a</sup> Guobin Zhang,<sup>a</sup> Kangning Zhao,<sup>a</sup> Chunjuan Tang,<sup>a,b</sup> Mengyu Yan,<sup>a</sup> Yulai Han<sup>a</sup> and Liqiang Mai<sup>a\*</sup>

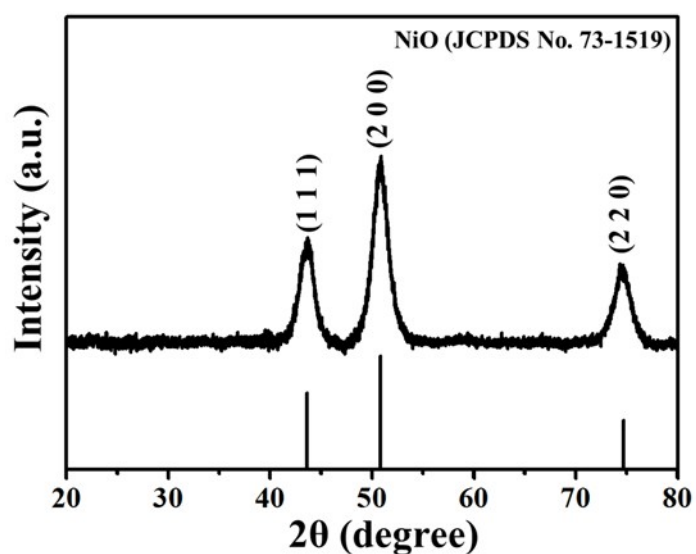

**Figure S1.** XRD pattern of the synthesized NiO hollow nanospheres.

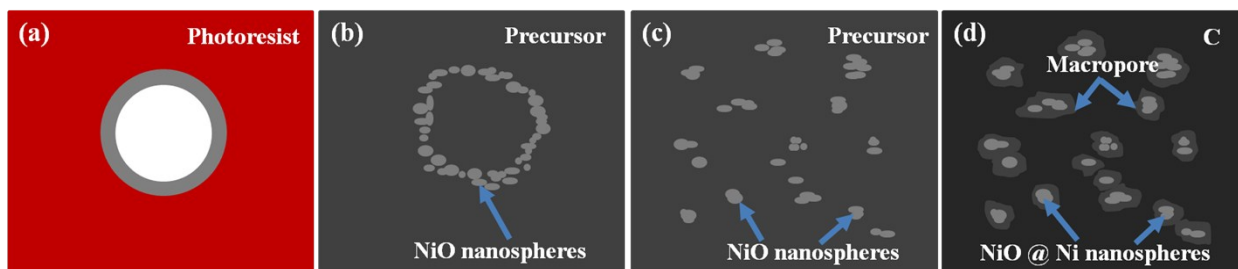

**Figure S2.** The formation of NiO/Ni nanospheres embedded in pyrolyzed carbon. (a) NiO hollow nanospheres are dispersed in photoresist. (b) NiO hollow nanospheres were deformed during the pre-carbonization stage. (c) NiO nanospheres collapsed in the precursor, and some nanospheres agglomerate together to form large clusters. (d) NiO was reduced to Ni by carbon during the pyrolysis, and NiO@Ni formed in the macropores of carbon.

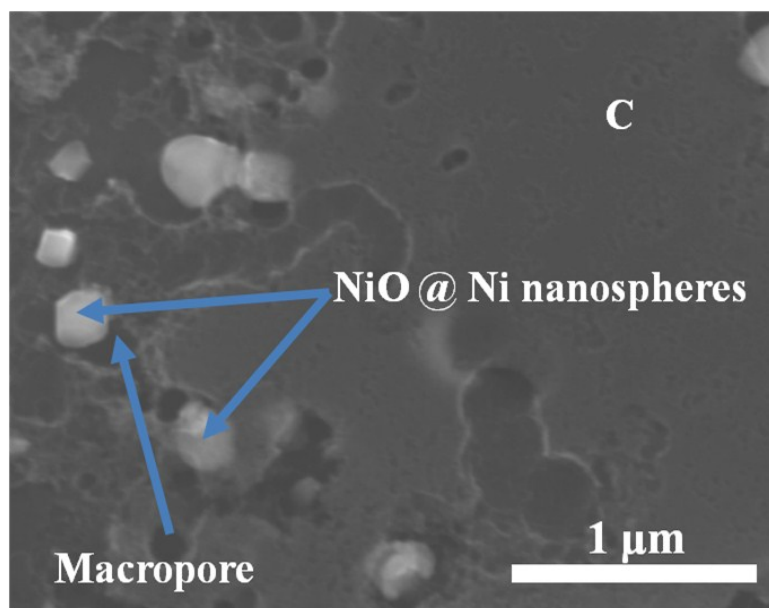

**Figure S3.** SEM image of the sample with NiO@Ni nanospheres and carbon macropores.
